# Supplementary material for: Diverse Genetic Landscape of Suspected Retinitis Pigmentosa in a Large Korean Cohort
Source: MDPI journal article supplement (doi:10.3390/genes12050675), 2021-04-30

**Table S1.** Targeted next-generation sequencing panel consisted of 88 genes associated with RP.

|                 |              |               |                |               |                |               |                 |               |                |
|-----------------|--------------|---------------|----------------|---------------|----------------|---------------|-----------------|---------------|----------------|
| <i>ABCA4</i>    | <i>AIPL1</i> | <i>ALMS1</i>  | <i>ARL6</i>    | <i>ATF6</i>   | <i>BBS2</i>    | <i>BEST1</i>  | <i>C2orf71</i>  | <i>CA4</i>    | <i>CACNA1F</i> |
| <i>CACNA2D4</i> | <i>CDH23</i> | <i>CDHR1</i>  | <i>CERKL</i>   | <i>CLRN1</i>  | <i>CNGA1</i>   | <i>CNGB1</i>  | <i>CNNM4</i>    | <i>CRB1</i>   | <i>CRX</i>     |
| <i>DFNB31</i>   | <i>DHDDS</i> | <i>EYS</i>    | <i>FAM161A</i> | <i>FLVCR1</i> | <i>FSCN2</i>   | <i>GUCA1A</i> | <i>GUCA1B</i>   | <i>GUCY2D</i> | <i>HARS</i>    |
| <i>HGSNAT</i>   | <i>IDH3B</i> | <i>IFT140</i> | <i>IFT172</i>  | <i>IL1A</i>   | <i>IL1B</i>    | <i>IMPDH1</i> | <i>IMPG2</i>    | <i>KCNV2</i>  | <i>KLHL7</i>   |
| <i>LRAT</i>     | <i>MAK</i>   | <i>MFRP</i>   | <i>MYO7A</i>   | <i>NPHP4</i>  | <i>NR2E3</i>   | <i>NRL</i>    | <i>OFD1</i>     | <i>PANK2</i>  | <i>PCDH15</i>  |
| <i>PDE6A</i>    | <i>PDE6B</i> | <i>PDE6C</i>  | <i>PDE6G</i>   | <i>PDZD7</i>  | <i>PITPNM3</i> | <i>PROM1</i>  | <i>PRPF3</i>    | <i>PRPF31</i> | <i>PRPF6,</i>  |
| <i>PRPF8</i>    | <i>PRPH2</i> | <i>RBP3</i>   | <i>RDH12</i>   | <i>RGR</i>    | <i>RHO</i>     | <i>RIMS1</i>  | <i>RLBP1</i>    | <i>ROM1</i>   | <i>RP1</i>     |
| <i>RP2</i>      | <i>RPE65</i> | <i>RPGR</i>   | <i>RPGRIP1</i> | <i>RRM2B,</i> | <i>SAG</i>     | <i>SEMA4A</i> | <i>SNRNP200</i> | <i>SPATA7</i> | <i>TOPORS</i>  |
| <i>TTC8</i>     | <i>TTPA</i>  | <i>TULP1</i>  | <i>UNC119</i>  | <i>USH1G</i>  | <i>USH2A</i>   | <i>ZNF408</i> | <i>ZNF513</i>   |               |                |

**Table S2.** The proportion of pathogenic variants according to segregation analysis.

|                         | Initial<br>analysis | After re-assessment               |                                      | Total     |
|-------------------------|---------------------|-----------------------------------|--------------------------------------|-----------|
|                         |                     | With familial<br>segregation test | Without familial<br>segregation test |           |
| No. of variants, n      | 161                 | 58                                | 129                                  | 181       |
| PV, n (%) <sup>a</sup>  | 45 (28.0)           | 18 (31.0)                         | 31 (24.0)                            | 47 (26.0) |
| LPV, n (%) <sup>a</sup> | 55 (34.2)           | 13 (22.4)                         | 48 (37.2)                            | 58 (32.0) |
| VUS, n (%) <sup>a</sup> | 61 (37.9)           | 27 (46.6)                         | 50 (38.8)                            | 76 (42.0) |

**Abbreviations:** PV, pathogenic variant; LPV, likely pathogenic variant; VUS, variant of uncertain significance

<sup>a</sup> The percentages were calculated for a subgroup according to segregation tests.

**Table S3.** Clinical characteristics according to the presence of family history.

|                                                  |    | With family history<br>n = 91 (32.6%) | Without family history<br>n = 188 (67.4%) | <i>P value</i>     |
|--------------------------------------------------|----|---------------------------------------|-------------------------------------------|--------------------|
| Sex, M:F, n (%)                                  |    | 42:49 (46.2:53.8)                     | 89:99 (47.3:52.7)                         | 0.852 <sup>a</sup> |
| Age at genetic examination,<br>years             |    | 50.7±15.5                             | 46.1±15.7                                 | 0.655 <sup>b</sup> |
| Age at symptom onset,<br>years                   |    | 23.2±15.5                             | 26.8±17.7                                 | 0.011 <sup>b</sup> |
| Age at diagnosis, years                          |    | 41.9±15.7                             | 40.6±15.2                                 | 0.383 <sup>b</sup> |
| BCVA, LogMAR                                     | RE | 1.1±1.2                               | 0.6±0.9                                   | 0.000 <sup>b</sup> |
|                                                  | LE | 1.0±1.1                               | 0.7±0.9                                   | 0.000 <sup>b</sup> |
| No. of probands with<br>detected variants, n (%) |    | 66 (72.5)                             | 105 (55.9)                                | 0.007 <sup>a</sup> |

**Abbreviations:** M, male; F, female; SD, standard deviation; BCVA, best-corrected visual acuity; LogMAR, logarithm of the minimum angle of resolution; RE, right eye; LE, left eye

<sup>a</sup> Pearson chi square test

<sup>b</sup> Independent t test was used and *p*-values < 0.05 were considered statistically significant.

**Table S4.** A list of variants detected in targeted next-generation sequencing and whole exom sequencing in this study.

| Gene           | NM number       | HGVS DNA change | HGVS protein change | Zygosity | chromosome | inheritance | ACMG criteria |       |
|----------------|-----------------|-----------------|---------------------|----------|------------|-------------|---------------|-------|
| <i>ABCA4</i>   | NM_000350.2     | c.1699G>A       | p.Val567Met         | hetero   | 1          | AD/AR       | LPV           |       |
| <i>ABCA4</i>   | NM_000350.2     | c.1760+2T>G     |                     | hetero   | 1          | AD/AR       | PV            |       |
| <i>ABCA4</i>   | NM_000350.2     | c.1933G>A       | p.Asp645Asn         | hetero   | 1          | AD/AR       | VUS           |       |
| <i>ABCA4</i>   | NM_000350.2     | c.5063dup       | p.Ser1689LeufsTer98 | hetero   | 1          |             | LPV           | Novel |
| <i>ABCA4</i>   | NM_000350.2     | c.5881G>A       | p.Gly1961Arg        | hetero   | 1          | AD/AR       | LPV           |       |
| <i>ABCA4</i>   | NM_000350.2     | c.880C>T        | p.Gln294Ter         | hetero   | 1          | AD/AR       | PV            |       |
| <i>ABCC6</i>   | NM_001171.5     | c.3703C>T       | p.Arg1235Trp        | hetero   | 16         | AD          | PV            |       |
| <i>ABCC6</i>   | NM_001171.5     | c.3698T>C       | p.Val1233Ala        | hetero   | 16         | AD/AR       | VUS           |       |
| <i>ADGRV1</i>  | NM_032119.3     | c.15608A>C      | p.Glu5203Ala        | hetero   | 5          | AR/DR       | VUS           |       |
| <i>ADGRV1</i>  | NM_032119.3     | c.6221T>C       | p.Val2074Ala        | hetero   | 5          | AR/DR       | VUS           |       |
| <i>ADGRV1</i>  | NM_032119.3     | c.7071_7073G    |                     | hetero   | 5          | AR          | LPV           | Novel |
| <i>ADGRV1</i>  | NM_032119.3     | c.7406G>A       | p.Trp2469Ter        | hetero   | 5          | AR          | PV            |       |
| <i>ARL6</i>    | NM_001278.293.2 | c.281T>C        | p.Ile94Thr          | homo     | 3          | AR/DR       | PV            |       |
| <i>BEST1</i>   | NM_001139.443.1 | c.19_21C        |                     | hetero   | 11         |             | LPV           |       |
| <i>BEST1</i>   | NM_001139.443.1 | c.857C>A        | p.Pro286His         | hetero   | 11         |             | VUS           |       |
| <i>BEST1</i>   | NM_001300.786.1 | c.908T>C        | p.Ile303Thr         | hetero   | 11         | AD/AR       | VUS           |       |
| <i>BEST1</i>   | NM_001139.443.1 | c.989T>C        | p.Ile330Thr         | hetero   | 11         | AD          | VUS           |       |
| <i>C21orf2</i> | NM_001271.440.1 | c.319T>C        | p.Tyr107His         | homo     | 21         | AR          | LPV           |       |
| <i>CAPN5</i>   | NM_004055.4     | c.976A>T        | p.Tyr326Ser         | hetero   | 11         | AD          | VUS           | Novel |
| <i>CDH23</i>   | NM_022124.5     | c.3038G>A       | p.Arg1013Gln        | hetero   | 10         | AD/AR       | VUS           |       |
| <i>CDH23</i>   | NM_022124.5     | c.1282G>A       | p.Asp428Asn         | hetero   | 10         | AR/DR       | VUS           |       |
| <i>CDHR1</i>   | NM_001171.971.2 | c.601G>A        | p.Glu201Lys         | hetero   | 10         | AR          | VUS           |       |
| <i>CDHR1</i>   | NM_001171.971.2 | c.700G>A        | p.Val234Ile         | hetero   | 10         | AR          | VUS           |       |
| <i>CDHR1</i>   | NM_033100.3     | c.2027T>A       | p.Ile676Asn         | homo     | 10         | AR          | VUS           |       |
| <i>CEP290</i>  | NM_025114.3     | c.1711+1G>A     |                     | hetero   | 12         | AR          | PV            |       |
| <i>CEP290</i>  | NM_025114.3     | c.14T>G         | p.Ile5Arg           | hetero   | 12         | AR          | VUS           |       |
| <i>CHM</i>     | NM_000390.3     | c.1718_1719del  | p.Tyr573CysfsTer12  | hemi     | X          |             | PV            |       |
| <i>CHM</i>     | NM_000390       | c.2T>A          | p.Met1Lys           | hemi     | X          | XL          | VUS           |       |

|        |           |                |                |        |    |       |     |       |
|--------|-----------|----------------|----------------|--------|----|-------|-----|-------|
|        | .3        |                |                |        |    |       |     |       |
| CHM    | NM_000390 | c.652_655del   | p.Ser218Lysfs  | hemi   | X  | XL    | LPV |       |
|        | .3        |                | Ter13          |        |    |       |     |       |
| CHM    | NM_000390 | c.688delinsT   |                | hemi   | X  |       | LPV |       |
|        | .3        | G              |                |        |    |       |     |       |
| CNGAI  | NM_001142 | c.398delG      | p.Gly133fs     | hetero | 4  | AR    | PV  |       |
|        | 564.1     |                |                |        |    |       |     |       |
| CNGAI  | NM_001142 | c.1067G>A      | p.Arg356Lys    | hetero | 4  | AD/AR | VUS |       |
|        | 564.1     |                |                |        |    |       |     |       |
| CNGAI  | NM_001142 | c.472del       | p.Leu158fs     | homo   | 4  | AR    | PV  |       |
|        | 564.1     |                |                |        |    |       |     |       |
| CNGAI  | NM_001142 | c.2134C>T      | p.Arg712Ter    | hetero | 4  | AR    | VUS |       |
|        | 564.1     |                |                |        |    |       |     |       |
| CNGB1  | NM_001297 | c.217+5G>C     |                | homo   | 16 | AR    | LPV |       |
|        | .4        |                |                |        |    |       |     |       |
| CRB1   | NM_001193 | c.1240C>T      | p.Arg414Ter    | hetero | 1  | AD/AR | PV  |       |
|        | 640.1     |                |                |        |    |       |     |       |
| CRB1   | NM_201253 | c.1576C>T      | p.Arg526Ter    | hetero | 1  | AD/AR | PV  |       |
|        | .2        |                |                |        |    |       |     |       |
| CRB1   | NM_201253 | c.2198A>G      | p.Tyr733Cys    | hetero | 1  | AD/AR | VUS |       |
|        | .2        |                |                |        |    |       |     |       |
| CRB1   | NM_001257 | c.550G>A       | p.Gly184Arg    |        | 1  | AD/AR | VUS | Novel |
|        | 965.1     |                |                |        |    |       |     |       |
| CRB1   | NM_201253 | c.653-2A>T     |                | hetero | 1  | AD/AR | PV  |       |
|        | .2        |                |                |        |    |       |     |       |
| CYP4V2 | NM_207352 | c.1072G>T      | p.Glu358Ter    | homo   | 4  | AR    | LPV |       |
|        | .3        |                |                |        |    |       |     |       |
| CYP4V2 | NM_207352 | c.219T>A       | p.Phe73Leu     | hetero | 4  | AR    | VUS |       |
|        | .3        |                |                |        |    |       |     |       |
| CYP4V2 | NM_207352 | c.675-1G>A     |                | hetero | 4  | AR    | LPV | Novel |
|        | .3        |                |                |        |    |       |     |       |
| CYP4V2 | NM_207352 | c.802_807A     |                | hetero | 4  | AR    | LPV |       |
|        | .3        |                |                |        |    |       |     |       |
| CYP4V2 | NM_207352 | c.802-8_807del |                | hetero | 4  | AR    | LPV |       |
|        | .3        |                |                |        |    |       |     |       |
| CYP4V2 | NM_207352 | c.809_810C     |                | hetero | 4  |       | LPV |       |
|        | .3        |                |                |        |    |       |     |       |
| CYP4V2 | NM_207352 | c.992A>C       | p.His331Pro    | hetero | 4  |       | LPV |       |
|        | .3        |                |                |        |    |       |     |       |
| EYS    | NM_001142 | c.1382G>A      | p.Cys461Tyr    | hetero | 6  | AR    | VUS |       |
|        | 800.1     |                |                |        |    |       |     |       |
| EYS    | NM_001142 | c.1963G>T      | p.Gly655Ter    | hetero | 6  | AR    | PV  | Novel |
|        | 800.1     |                |                |        |    |       |     |       |
| EYS    | NM_001292 | c.1989del      | p.Tyr664IlefsT | hetero | 6  | AR    | LPV | Novel |
|        | 009.1     |                | er19           |        |    |       |     |       |
| EYS    | NM_001142 | c.2259+1G>T    | Splicing       | hetero | 6  | AR    | LPV |       |
|        | 800.1     |                | variant        |        |    |       |     |       |
| EYS    | NM_001142 | c.2528G>A      | p.Gly843Glu    | hetero | 6  | AR    | LPV |       |
|        | 800.1     |                |                |        |    |       |     |       |
| EYS    | NM_001142 | c.2641+1G>A    |                | hetero | 6  | AR    | PV  | Novel |
|        | 800.1     |                |                |        |    |       |     |       |
| EYS    | NM_001142 | c.4957dup      | p.Ser1653fs    | hetero | 6  | AR    | PV  |       |
|        | 800.1     |                |                |        |    |       |     |       |
| EYS    | NM_001142 | c.4958delins   |                | hetero | 6  | AR    | PV  | Novel |
|        | 800.1     | AG             |                |        |    |       |     |       |
| EYS    | NM_001292 | c.525_527del   | p.Glu176del    | hetero | 6  | AR    | VUS |       |
|        | 009.1     |                |                |        |    |       |     |       |
| EYS    | NM_001142 | c.586A>C       | p.Lys196Gln    | hetero | 6  | AR    | VUS |       |
|        | 800.1     |                |                |        |    |       |     |       |
| EYS    | NM_001142 | c.6098_6105d   | p.Gly2036Ilefs | hetero | 6  | AR    | LPV | Novel |

|                |                    |                    |                          |        |    |       |     |       |
|----------------|--------------------|--------------------|--------------------------|--------|----|-------|-----|-------|
|                | 800.1              | up                 | Ter6                     |        |    |       |     |       |
| <i>EYS</i>     | NM_001292<br>009.1 | c.6117del          | p.Val2040Leuf<br>sTer2   | hetero | 6  | AR    | LPV | Novel |
| <i>EYS</i>     | NM_001142<br>800.1 | c.6557G>A          | p.Gly2186Glu             | hetero | 6  | AR    | LPV |       |
| <i>EYS</i>     | NM_001142<br>800.1 | c.6571+6T>A        |                          | hetero | 6  | AR    | VUS | Novel |
| <i>EYS</i>     | NM_001142<br>800.1 | c.7394C>G          | p.Thr2465Ser             | hetero | 6  | AR    | VUS |       |
| <i>EYS</i>     | NM_001142<br>800.1 | c.7492G>C          | p.Ala2498Pro             | hetero | 6  | AR    | VUS |       |
| <i>EYS</i>     | NM_001142<br>800.1 | c.7679C>T          | p.Pro2560Leu             | hetero | 1  | AR    | VUS |       |
| <i>EYS</i>     | NM_001142<br>800.1 | c.8805C>A          | p.Tyr2935Ter             | hetero | 6  | AR    | PV  |       |
| <i>EYS</i>     | NM_001292<br>009.1 | c.9095T>C          | p.Ile3032Thr             | hetero | 6  | AR    | VUS | Novel |
| <i>EYS</i>     | NM_001142<br>800.1 | c.9368delA         | p.Asn3123fs              | hetero | 6  | AR    | LPV |       |
| <i>FAM161A</i> | NM_001201<br>543.1 | c.1851-2A>T        |                          | homo   | 2  | AR    | LPV | Novel |
| <i>FBN2</i>    | NM_001999<br>.3    | c.8279A>C          | p.Glu2760Ala             | hetero | 5  | AD    | VUS |       |
| <i>FBN2</i>    | NM_001999<br>.3    | c.2633C>T          | p.Ser878Leu              | hetero | 5  | AD    | VUS |       |
| <i>FSCN2</i>   | NM_001077<br>182.2 | c.1033C>T          | p.Lue345Phe              | hetero | 17 | AD    | VUS |       |
| <i>GNAT1</i>   | NM_000172<br>.3    | c.814_817G         |                          | hetero | 3  | AD    | VUS |       |
| <i>GNAT1</i>   | NM_000172<br>.3    | c.947A>G           | p.Tyr316Cys              | hetero | 3  | AD    | VUS |       |
| <i>GNAT1</i>   | NM_144499<br>.2    | c.753 C>A          | p.Asn251Lys              | hetero | 3  |       | VUS |       |
| <i>HGSNAT</i>  | NM_152419<br>.2    | c.34_54del         | p.Leu12_Leu1<br>8del     | hetero | 8  | AR    | VUS | Novel |
| <i>HGSNAT</i>  | NM_152419<br>.2    | c.1030C>T          | p.Arg344Cys              | hetero | 8  | AR    | VUS |       |
| <i>HK1</i>     | NM_033500<br>.2    | c.27+1G>C          | splice_donor_v<br>ariant | hetero | 10 | AD    | LPV |       |
| <i>HK1</i>     | NM_001322<br>365.1 | c.83_84T           |                          | hetero | 10 | AD    | LPV | Novel |
| <i>IFT140</i>  | NM_014714<br>.3    | c.2137C>T          | p.Arg713Trp              | hetero | 16 | AR    | VUS |       |
| <i>IFT140</i>  | NM_014714<br>.3    | c.217C>T           | p.Arg73Trp               | hetero | 16 | AR    | VUS |       |
| <i>IFT140</i>  | NM_014714<br>.3    | c.1183G>A          | p.Val395Met              | hetero | 16 | AR    | VUS |       |
| <i>IFT140</i>  | NM_014714<br>.3    | c.2551_2563d<br>el | p.Val851fs               | hetero | 16 | AR    | LPV | Novel |
| <i>IMPDH1</i>  | NM_000883<br>.3    | c.947G>C           | p.Arg316Pro              | hetero | 7  | AD    | LPV | Novel |
| <i>IMPG1</i>   | NM_001282<br>368.1 | c.1586A>C          | p.Gln529Pro              |        | 6  |       | VUS | Novel |
| <i>IMPG2</i>   | NM_016247<br>.3    | c.1589C>A          | p.Ser530Ter              | hetero | 3  | AD/AR | PV  |       |
| <i>IMPG2</i>   | NM_016247<br>.3    | c.2629A>C          | p.Met877Leu              | hetero | 3  | AD/AR | VUS |       |
| <i>MAK</i>     | NM_001242<br>957.2 | c.493T>A           | p.Tyr165Asn              | hetero | 6  |       | VUS |       |
| <i>MAK</i>     | NM_001242          | c.824C>A           | p.Ala275Glu              | hetero | 6  |       | VUS | Novel |

|               |                 |                |                    |        |    |       |     |       |
|---------------|-----------------|----------------|--------------------|--------|----|-------|-----|-------|
|               | 957.2           |                |                    |        |    |       |     |       |
| <i>MYO7A</i>  | NM_000260.3     | c.1301G>A      | p.Gly434Asp        | hetero | 11 | AR    | VUS |       |
| <i>MYO7A</i>  | NM_000260.3     | c.2107G>A      | p.Gly703Arg        | hetero | 11 | AR    | VUS |       |
| <i>MYO7A</i>  | NM_000260.3     | c.488G>A       | p.Gly163Glu        | hetero | 11 | AR    | VUS |       |
| <i>MYO7A</i>  | NM_000260.3     | c.5930G>A      | p.Arg1977Gln       | hetero | 11 | AR    | VUS |       |
| <i>NPHP1</i>  | NM_001128.179.1 | c.143G>A       | p.Arg48Lys         | hetero | 2  | AR    | VUS |       |
| <i>NPHP1</i>  | NM_001128.179.1 | c.1578_1582G   |                    | hetero | 2  | AR    | LPV |       |
| <i>NPHP4</i>  | NM_015102.4     | c.1972C>T      | p.Arg658Ter        | hetero | 1  | AR    | PV  |       |
| <i>NPHP4</i>  | NM_015102.4     | c.453-1G>C     |                    | hetero | 1  | AR    | PV  | Novel |
| <i>NR2E3</i>  | NM_014249.3     | c.646G>A       | p.Gly216Ser        | hetero | 15 | AD/AR | LPV |       |
| <i>NR2E3</i>  | NM_014249.3     | c.355C>A       | p.Gln119Lys        | hetero | 15 | AD/AR | VUS | Novel |
| <i>PCDH15</i> | NM_001142.763.1 | c.1799+1G>T    |                    | hetero | 10 | AR/DR | PV  |       |
| <i>PCDH15</i> | NM_001142.763.1 | c.1795C>T      | p.Arg599Ter        | hetero | 10 | AR/DR | PV  |       |
| <i>PDE6A</i>  | NM_000440.2     | c.1957C>T      | p.Arg653Ter        | hetero | 5  | AR    | PV  |       |
| <i>PDE6A</i>  | NM_000440.2     | c.2369G>A      | p.Arg790His        | hetero | 5  | AR    | VUS |       |
| <i>PDE6B</i>  | NM_000283.3     | c.1488del      | p.Thr497fs         | hetero | 4  | AR    | PV  |       |
| <i>PDE6B</i>  | NM_000283.3     | c.1547T>C      | p.Leu516Pro        | hetero | 4  | AR    | LPV |       |
| <i>PDE6B</i>  | NM_000283.3     | c.1604T>A      | p.Ile535Asn        | homo   | 4  | AR    | LPV |       |
| <i>PDE6B</i>  | NM_000283.3     | c.1669C>T      | p.His557Tyr        | homo   | 4  | AR    | LPV |       |
| <i>PDE6B</i>  | NM_000283.3     | c.1712C>T      | p.Thr571Met        | hetero | 4  | AR    | VUS |       |
| <i>PDE6B</i>  | NM_000283.3     | c.2395C>T      | p.Arg799Ter        | hetero | 4  | AR    | PV  |       |
| <i>PDE6B</i>  | NM_000283.3     | c.2492C>T      | p.Ala831Val        | hetero | 4  | AR    | VUS |       |
| <i>PDE6B</i>  | NM_000283.3     | c.592G>A       | p.Gly198Ser        | hetero | 4  | AD/AR | VUS |       |
| <i>PDE6B</i>  | NM_000283.3     | c.712del       | p.Val238fs         | hetero | 4  | AR    | LPV | Novel |
| <i>PDE6B</i>  | NM_000283.3     | c.815G>A       | p.Arg272Gln        | hetero | 4  | AD/AR | VUS |       |
| <i>PRCD</i>   | NM_001077.620.2 | c.2T>C         | p.Met1?            | homo   | 17 | AR    | PV  |       |
| <i>PRPF31</i> | NM_015629.3     | c.1120C>T      | p.Gln374Ter        | hetero | 19 | AD    | PV  |       |
| <i>PRPF31</i> | NM_015629.3     | c.320T>C       | p.Leu107Pro        | hetero | 19 | AD    | LPV | Novel |
| <i>PRPF31</i> | NM_015629.3     | c.489delC      | p.Ile164SerfsTer34 | hetero | 19 | AD    | LPV | Novel |
| <i>PRPF31</i> | NM_015629.3     | c.1489delinsAT |                    | hetero | 19 | AD    | LPV | Novel |
| <i>PRPF31</i> | NM_015629       | c.1060C>T      | p.Arg354Ter        | hetero | 19 | AD    | PV  |       |

|              |                          |                       |                        |        |    |       |     |       |
|--------------|--------------------------|-----------------------|------------------------|--------|----|-------|-----|-------|
| <i>PRPF8</i> | .3<br>NM_006445          | c.6902C>T             | p.Pro2301Leu           |        | 17 | AD    | VUS |       |
| <i>PRPF8</i> | .3<br>NM_006445          | c.6952_6953<br>C      |                        | hetero | 17 | AD/AR | LPV |       |
| <i>PRPF8</i> | .3<br>NM_006445          | c.1777C>T             | p.Arg593Ter            | hetero | 17 | AD    | LPV | Novel |
| <i>PRPH2</i> | .3<br>NM_000322          | c.478C>T              | p.Gln160Ter            | hetero | 6  | AD/AR | PV  |       |
| <i>RGR</i>   | .4<br>NM_001012<br>722.1 | c.717_718G            |                        | hetero | 10 | AD/AR | VUS |       |
| <i>RHO</i>   | .3<br>NM_000539          | c.1040C>T             | p.Pro347Leu            | hetero | 3  | AD/AR | LPV |       |
| <i>RHO</i>   | .3<br>NM_000539          | c.310G>A              | p.Val104Ile            | hetero | 3  | AD/AR | VUS |       |
| <i>RHO</i>   | .3<br>NM_000539          | c.36del               | p.Phe13fs              | hetero | 3  | AD/AR | PV  |       |
| <i>RHO</i>   | .3<br>NM_000539          | c.403C>T              | p.Arg135Trp            | hetero | 3  | AD/AR | LPV |       |
| <i>RHO</i>   | .3<br>NM_000539          | c.50C>T               | p.Thr17Met             | hetero | 3  | AD/AR | LPV |       |
| <i>RHO</i>   | .3<br>NM_000539          | c.965_966deli<br>nsAA | p.Cys322Ter            | hetero | 3  | AD/AR | LPV | Novel |
| <i>RHO</i>   | .3<br>NM_000539          | c.994G>C              | p.Glu332Gln            | hetero | 3  | AD/AR | VUS | Novel |
| <i>RPI</i>   | .3<br>NM_006269          | c.2238_2239d<br>el    | p.Ser747Ter            | hetero | 8  | AD/AR | LPV | Novel |
| <i>RPI</i>   | .1<br>NM_006269          | c.2296C>T             | p.Gln766Ter            | hetero | 8  | ADAR  | PV  |       |
| <i>RPI</i>   | .1<br>NM_006269          | c.256C>A              | p.Pro86Thr             | hetero | 8  | AD/AR | VUS |       |
| <i>RPI</i>   | .1<br>NM_006269          | c.4196del             | p.Cys1399fs            | hetero | 8  | AD/AR | PV  |       |
| <i>RPI</i>   | .1<br>NM_006269          | c.4196delG            | p.Cys1399Leu<br>fsTer5 | hetero | 4  | AD/AR | PV  |       |
| <i>RPI</i>   | .1<br>NM_006269          | c.5797C>T             | p.Arg1933Ter           | hetero | 8  | AD/AR | PV  |       |
| <i>RPI</i>   | .1<br>NM_006269          | c.5913C>A             | p.Asn1971Lys           | hetero | 8  | ADAR  | VUS |       |
| <i>RPI</i>   | .1<br>NM_006269          | c.5971C>T             | p.Gln1991Ter           | hetero | 8  | AD/AR | LPV |       |
| <i>RPI</i>   | .1<br>NM_006269          | c.6178_6179<br>G      |                        | hetero | 8  | AD/AR | LPV |       |
| <i>RPI</i>   | .1<br>NM_006269          | c.6179delins<br>GA    |                        | hetero | 8  | AD/AR | LPV | Novel |
| <i>RPI</i>   | .1<br>NM_006269          | c.6181del             | p.Ile2061fs            | hetero | 8  | AD/AR | VUS |       |
| <i>RPI</i>   | .1<br>NM_006269          | c.6353G>A             | p.Ser2118Asn           | hetero | 8  | AD/AR | VUS |       |
| <i>RPIL1</i> | .5<br>NM_178857          | c.347C>T              | p.Pro116Leu            | hetero | 8  | AD    | VUS | Novel |
| <i>RPIL1</i> | .5<br>NM_178857          | c.2123C>A             | p.Ser708Ter            | hetero | 8  |       | LPV |       |
| <i>RP2</i>   | .5<br>NM_006915          | c.353G>A              | p.Arg118His            | hemi   | X  | XL    | LPV |       |
| <i>RP9</i>   | .2<br>NM_203288          | c.380A>G              | p.Asn127Ser            | hetero | 7  | AD    | VUS | Novel |
| <i>RPGR</i>  | .1<br>NM_001034<br>853.1 | c.2032G>T             | p.Glu678Ter            | hemi   | X  | XL    | LPV |       |
| <i>RPGR</i>  | NM_001034                | c.2405_2406d          | p.Glu802fs             | hemi   | X  | XL    | PV  |       |



|                 |                          |                         |              |        |    |       |     |       |
|-----------------|--------------------------|-------------------------|--------------|--------|----|-------|-----|-------|
| <i>RPGR</i>     | 853.1<br>NM_000328<br>.2 | el<br>c.1599delinsTGACG |              | hemi   | X  | XL    | LPV |       |
| <i>RS1</i>      | NM_000330<br>.3          | c.78+1G>A               |              | hemi   | X  |       | LPV |       |
| <i>SEMA4A</i>   | NM_001193<br>300.1       | c.1120C>A               | p.Pro374Thr  | hetero | 1  | AD/AR | VUS |       |
| <i>SNRNP200</i> | NM_014014<br>.4          | c.1202A>G               | p.Glu401Gly  | hetero | 2  | AD    | VUS | Novel |
| <i>SNRNP200</i> | NM_014014<br>.4          | c.2041C>T               | p.Arg681Cys  | hetero | 2  | AD    | LPV |       |
| <i>TGFB1</i>    | NM_000358<br>.2          | c.371G>A                | p.Arg124His  | hetero | 5  |       | PV  |       |
| <i>TULP1</i>    | NM_001289<br>395.1       | c.800T>G                | p.Met267Arg  | hetero | 6  | AR    | VUS | Novel |
| <i>TULP1</i>    | NM_001289<br>395.1       | c.986T>C                | p.Phe329Ser  | hetero | 6  | AR    | PV  |       |
| <i>USH1G</i>    | NM_173477<br>.4          | c.164+5G>A              |              | homo   | 17 | AR    | VUS |       |
| <i>USH2A</i>    | NM_206933<br>.2          | c.10931C>T              | p.Thr3644Met | hetero | 1  | AR    | VUS |       |
| <i>USH2A</i>    | NM_206933<br>.2          | c.11136_11137del        | p.Gln3714fs  | hetero | 1  | AR    | LPV | Novel |
| <i>USH2A</i>    | NM_206933<br>.2          | c.11156G>A              | p.Arg3719His | hetero | 1  | AR    | PV  |       |
| <i>USH2A</i>    | NM_007123<br>.5          | c.1143G>A               | p.Gln381Gln  | hetero | 1  | AR    | LPV |       |
| <i>USH2A</i>    | NM_007123<br>.5          | c.1184C>T               | p.Thr395Met  | hetero | 1  | AR    | VUS |       |
| <i>USH2A</i>    | NM_206933<br>.2          | c.13339A>G              | p.Met4447Val | hetero | 1  | AR    | VUS |       |
| <i>USH2A</i>    | NM_206933<br>.2          | c.1450C>T               | p.Gln484Ter  | hetero | 1  | AR    | PV  | Novel |
| <i>USH2A</i>    | NM_206933<br>.2          | c.14557A>G              | p.Met4853Val | hetero | 1  | AR    | VUS |       |
| <i>USH2A</i>    | NM_206933<br>.2          | c.15178T>C              | p.Ser5060Pro | hetero | 1  | AR    | VUS |       |
| <i>USH2A</i>    | NM_206933<br>.2          | c.15518T>C              | p.Leu5173Pro | hetero | 1  | AR    | VUS | Novel |
| <i>USH2A</i>    | NM_206933<br>.2          | c.202C>T                | p.His68Tyr   | hetero | 1  | AR    | VUS |       |
| <i>USH2A</i>    | NM_206933<br>.2          | c.2802T>G               | p.Cys934Tr   | hetero | 1  | AR    | LPV |       |
| <i>USH2A</i>    | NM_007123<br>.5          | c.4070C>T               | p.Thr1357Met | hetero | 1  | AR    | VUS |       |
| <i>USH2A</i>    | NM_206933<br>.2          | c.451G>C                | p.Ala151Pro  | hetero | 1  | AR    | VUS | Novel |
| <i>USH2A</i>    | NM_206933<br>.2          | c.6326-1G>T             |              | hetero | 1  | AR    | PV  |       |
| <i>USH2A</i>    | NM_206933<br>.2          | c.7046G>A               | p.Trp2349Ter | hetero | 1  | AR    | PV  | Novel |
| <i>USH2A</i>    | NM_206933<br>.2          | c.7880T>C               | p.12627Thr   | hetero | 1  | AR    | VUS | Novel |
| <i>USH2A</i>    | NM_206933<br>.2          | c.8254G>A               | p.Gly2752Arg | hetero | 1  | AR    | VUS |       |
| <i>USH2A</i>    | NM_206933<br>.2          | c.8559-2A>G             |              | hetero | 1  | AR    | PV  |       |
| <i>USH2A</i>    | NM_206933<br>.2          | c.9258+1G>T             |              | hetero | 1  | AR    | PV  |       |
| <i>VPS13B</i>   | NM_017890                | c.11468G>C              | p.Gly3823Ala | hetero | 8  | AR    | VUS | Novel |

|               |                 |                  |             |        |   |    |     |       |
|---------------|-----------------|------------------|-------------|--------|---|----|-----|-------|
| <i>VPS13B</i> | .4<br>NM_017890 | c.7220_7221<br>A |             | hetero | 8 | AR | PV  |       |
| <i>WDR19</i>  | .4<br>NM_025132 | c.1613G>T        | p.Gly538Val | hetero |   | AR | VUS | Novel |
| <i>WDR19</i>  | .3<br>NM_025132 | c.2645+1G>T      |             | hetero |   | AR | LPV |       |
|               | .3              |                  |             |        |   |    |     |       |

**Abbreviations:** HGVS, Human Genome Variation Society; ACMG, American College of Medical Genetics and Genomics; AD, autosomal dominant; AR, autosomal recessive; XL, x-linked inheritance; PV, pathogenic variant; LPV, likely pathogenic variant; VUS, variant of unknown significance

**Figure S1.** Ocular characteristics of patients with unexpected genetic results. From left to right: wide fundus photographs, fundus autofluorescence images, optical coherence tomography images, and electroretinogram results from patients with unexpected genotypes. **a)** A woman in her mid-20s with retinal pigmentary dystrophy from pseudoxanthoma elasticum due to *ABCC6*. **b)** A teenage boy with reticular pigmentary dispersions in choroideremia caused by *CHM*. **c)** A woman in her early-50s showing chorioretinal degeneration with yellow-white crystals in Bietti crystalline dystrophy associated with *CYP4V2*. **d)** A man in his mid-40s showing peripheral retinal degeneration with foveal retinoschisis caused by *RS1*. **e)** A teenage boy with corneal dystrophy concomitant with retinal pigmentary degeneration due to *TGFBI*. **f)** A woman in her early-40s with Cohen syndrome; retinal dystrophy and mental impairment caused by *VPS13B*. **g)** A woman in her early-20s with retinal pigmentary change associated with Senior-Løken syndrome due to *WDR19*.

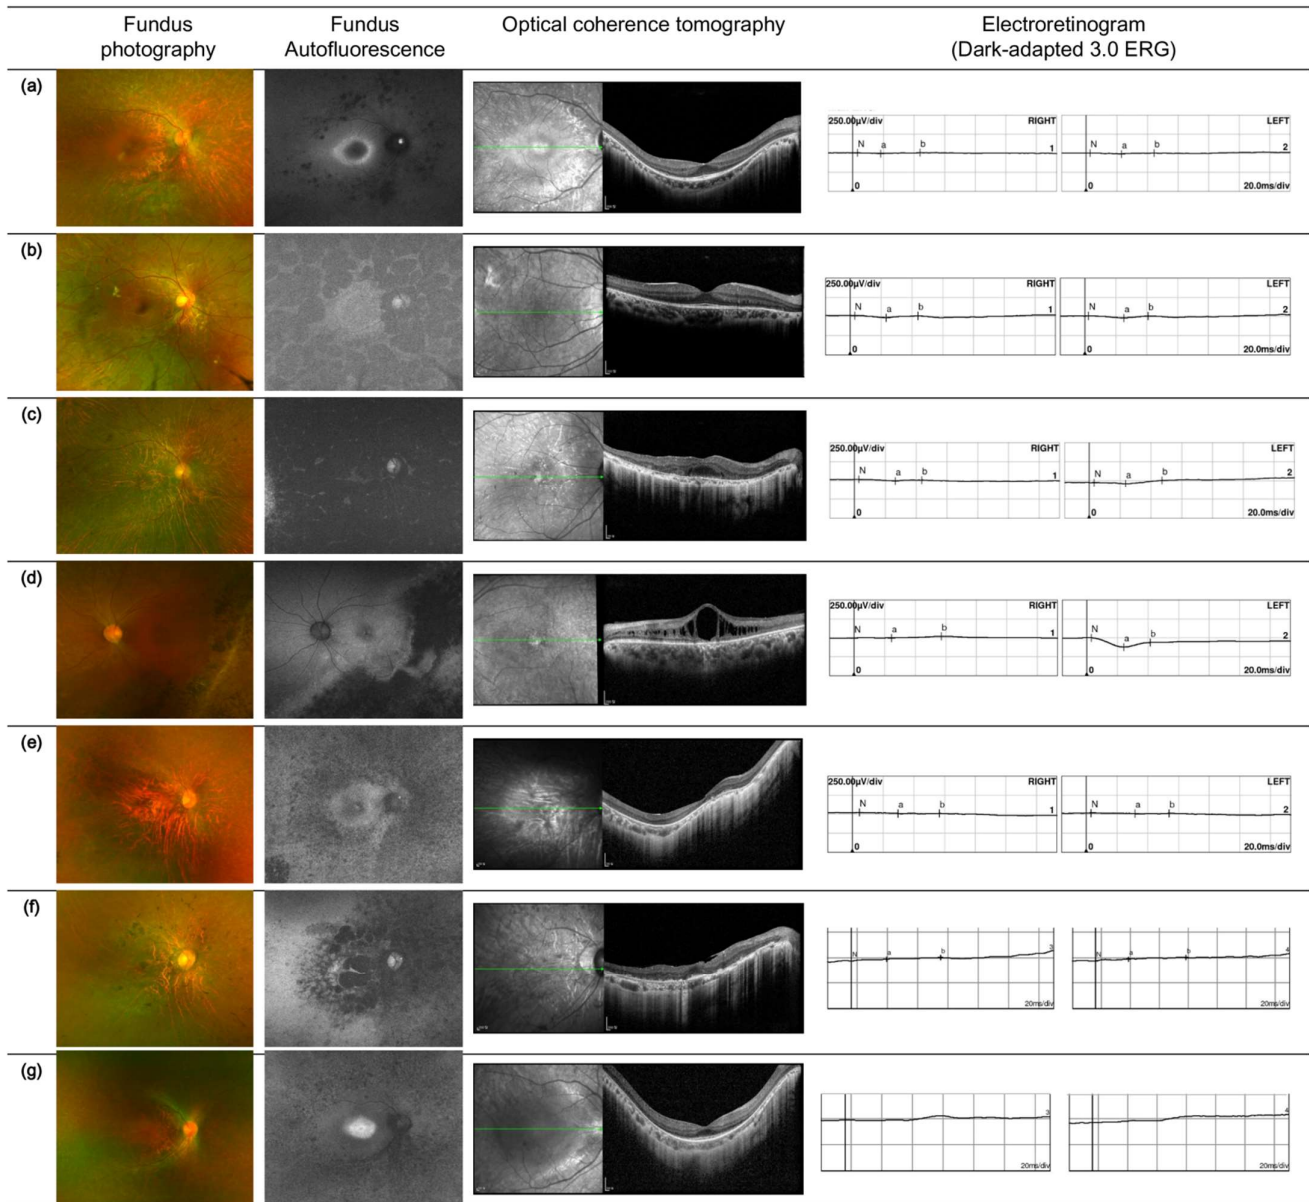

**Table S5.** List of patients with inconclusive results.

| Genetic results |                |                 |                     |          |             |          |               |                |       | Phenotype suggested by genotype | Reason for inconclusive results                                                                                                                                                                                                                                                                   |
|-----------------|----------------|-----------------|---------------------|----------|-------------|----------|---------------|----------------|-------|---------------------------------|---------------------------------------------------------------------------------------------------------------------------------------------------------------------------------------------------------------------------------------------------------------------------------------------------|
| Subject No.     | Causative gene | HGVS DNA change | HGVS protein change | Zygosity | Inheritance | Origin   | ACMG criteria |                |       |                                 |                                                                                                                                                                                                                                                                                                   |
| 30-40           | SNRNP200       | c.3268C>T       | p.R1090W            | Hetero   | AD          | Unknown  | VUS           | PM2,PM5,P2,PP3 |       | RP                              | <ul style="list-style-type: none"><li>◦ Wild type mother and carrier healthy sister</li><li>◦ Impossible to determine whether there was a difference of penetrance between sister and the patient or another genetic cause</li></ul>                                                              |
| 41-60           | GNAT1          | c.814_817G      |                     | Hetero   | AD          | Unknown  | VUS           | PM2,PM4        | Novel | CSNB                            | <ul style="list-style-type: none"><li>◦ Affected father from history taking, wild type healthy sister and carrier son without symptoms</li><li>◦ Ophthalmologic findings including pigmentary fundus, CME, and extinguished ERG not compatible with CSNB from AD inherited <i>PDE6B</i></li></ul> |
|                 | GNAT1          | c.947A>G        | p.Y316C             | Hetero   | AD          | Unknown  | VUS           | PM2,PP2,P3     |       |                                 |                                                                                                                                                                                                                                                                                                   |
| 48-71           | IMPG1          | c.1586A>C       | p.Q529P             | Hetero   | AD          | Paternal | VUS           | PM2            | Novel | Vitelliform macular dystrophy   | <ul style="list-style-type: none"><li>◦ <i>IMPG1</i> in the patient and her affected brother from affected father</li><li>◦ Fundus findings including localized pigmentation around supero-temporal main arcade with CME not compatible with vitelliform dystrophy</li></ul>                      |
| 59-94           | CEP290         | c.1711+1G>A     |                     | Hetero   | AR          | Unknown  | PV            | PVS1,PM2,PP5   |       | Joubert syndrome                | <ul style="list-style-type: none"><li>◦ No family history of RP</li><li>◦ Physical examination showed no evidence of systemic manifestation except retinal</li></ul>                                                                                                                              |
|                 | CEP290         | c.14T>G         | p.Ile5Arg           | Hetero   | AR          | Unknown  | VUS           | PM2,PM5,       | Novel |                                 |                                                                                                                                                                                                                                                                                                   |

|         |       |           |             |        |    | n        |     | BP1            |       |                                             | change                                                                                                                                                                                                                                                                               |
|---------|-------|-----------|-------------|--------|----|----------|-----|----------------|-------|---------------------------------------------|--------------------------------------------------------------------------------------------------------------------------------------------------------------------------------------------------------------------------------------------------------------------------------------|
| 71-109  | GNAT1 | c.753 C>A | p.Asn251Lys | Hetero | AD | Paternal | VUS | PP2, PP3       |       | CSNB                                        | <ul style="list-style-type: none"> <li>◦ <i>GNAT1</i> from asymptomatic father</li> <li>◦ Ophthalmologic findings including diffuse pigmentary changes and low amplitude of ERG response not compatible with CSNB</li> </ul>                                                         |
| 175-227 | CAPN5 | c.976A>T  | p.T326S     | Hetero | AD | De novo  | VUS | PS2,PM2,P2,BP4 | Novel | Vitreoretinopathy, neovascular inflammatory | <ul style="list-style-type: none"> <li>◦ No family history of RP and true de-novo <i>CAPN5</i> variant</li> <li>◦ Fundus findings of diffuse pigmentation and bullseye pattern autofluorescence do not match the phenotypes of neovascular inflammatory vitreoretinopathy</li> </ul> |
| 216-294 | CRB1  | c.1240C>T | p.R414X     | Hetero | AD | Unknown  | PV  | PVS1,PM2,PP5   |       | PPCA                                        | <ul style="list-style-type: none"> <li>◦ Her two sons revealed one with wild type and one as an asymptomatic carrier</li> <li>◦ Extensive pigmentary atrophy of the entire retinal tissue with spared macula is controversial to conclude with PPCA</li> </ul>                       |

---

**Abbreviations:** HGVS, Human Genome Variation Society; ACMG, American College of Medical Genetics and Genomics; AD, autosomal dominant; AR, autosomal recessive; PV, pathogenic variant; VUS, variant of unknown significance; BP, benign supporting; PM, pathogenic moderate; PP, pathogenic supporting; PS, pathogenic strong; PVS, pathogenic very strong; PPCA, pigmented paravenous chorioretinal atrophy; CSNB, congenital stationary night blindness; CME, cystoid macular edema; RP, retinitis pigmentosa

**Figure S2.** Clinical characteristics of patients with inconclusive results. From left to right: wide fundus photographs and fundus autofluorescence images from both eyes, spectral-domain optical coherence tomography, Goldmann kinetic visual field test, and electroretinogram results examined from the same eye of patients with unexpected genotypes.

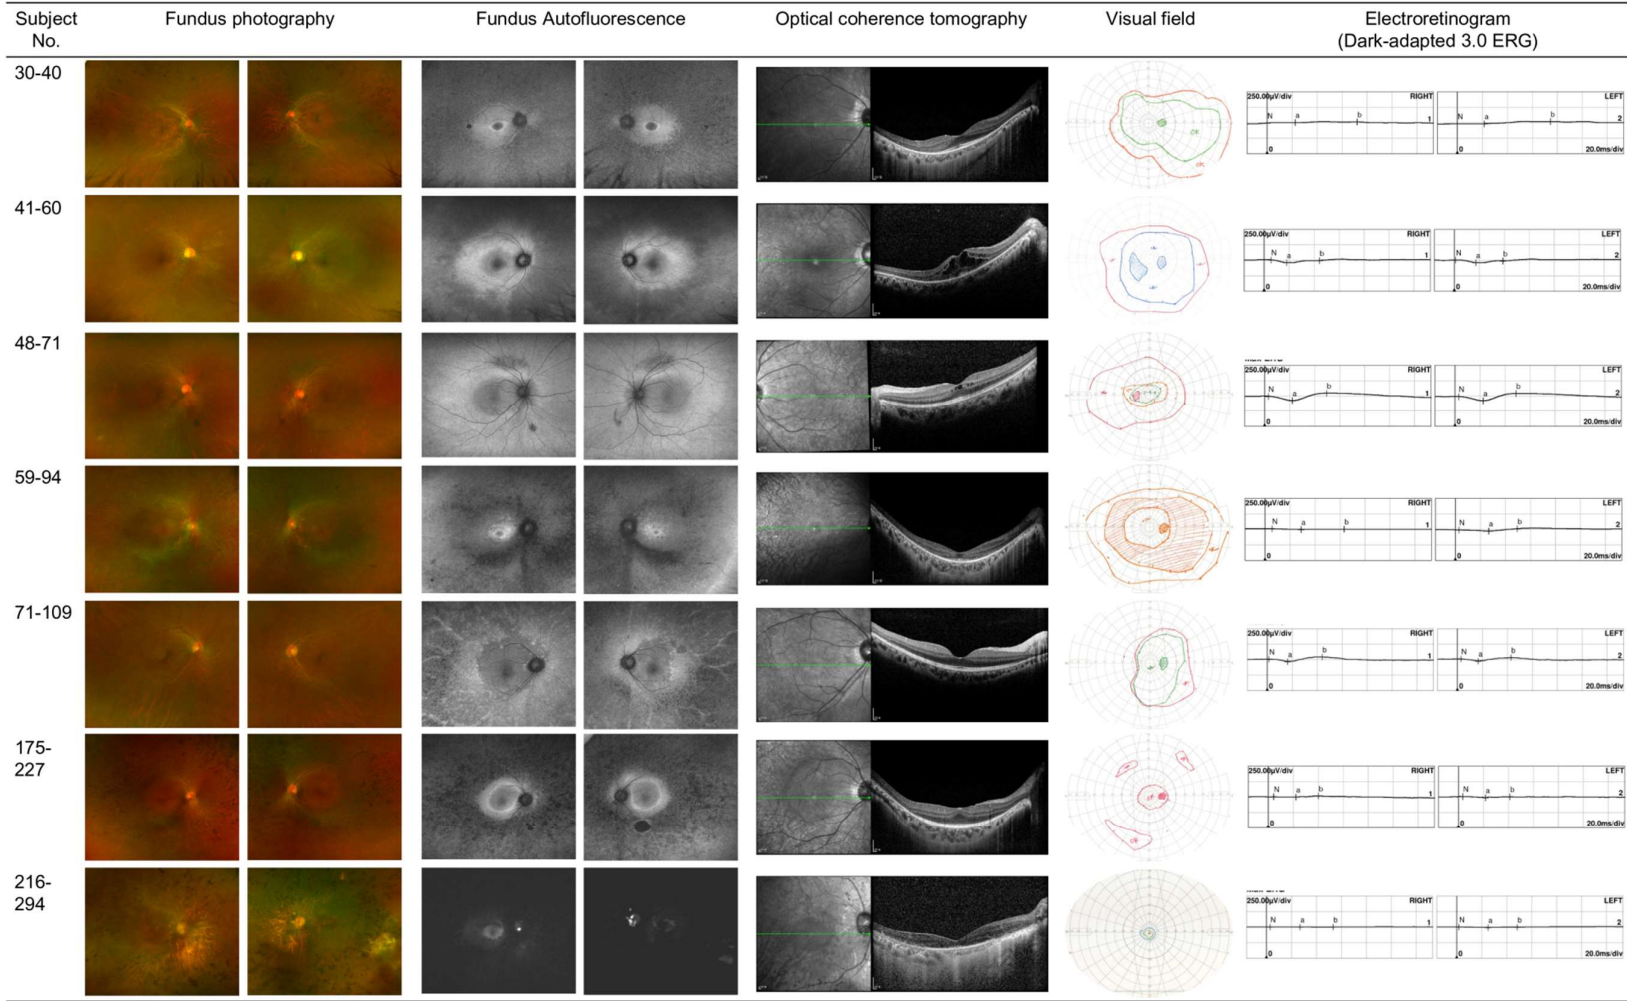

Supplement: s1 [file s1]
